# Supplementary material
Source: PubMed Central journal article supplement (PMC3060300)
Supplement: NIHMS247286-supplement-1_si_001.pdf [file NIHMS247286-supplement-1_si_001.pdf]

# Supporting Information

## Chain stiffness of elastin-like polypeptides

*Sabine Fluegel<sup>1</sup>, Karl Fischer<sup>1</sup>, Jonathan R. McDaniel<sup>2</sup>, Ashutosh Chilkoti<sup>2</sup> and Manfred Schmidt<sup>1\*</sup>*

<sup>1</sup>Institute of Physical Chemistry, University of Mainz, 55099 Mainz, Germany and <sup>2</sup>Department of Biomedical Engineering, Duke University, Durham, North Carolina 27708

**Synthesis of elastin-like polypeptides.** Five ELPs containing the sequence (VPGVG)<sub>n</sub>, where n = 20, 30, 40, 60, and 120, were synthesized using plasmid reconstruction recursive directional ligation, as described elsewhere.<sup>1</sup> Each of the ELP genes was restricted from its parent plasmid, purified via gel purification (Qiagen Gel Purification Kit; Germantown, MD), and inserted into a modified pET-24a+ expression plasmid (Invitrogen; Carlsbad, CA).

The modified plasmid was constructed by replacing the NdeI – BamHI cloning region of the pET-24a+ vector with a synthetic oligomer cassette (Integrated DNA Technologies Inc.; Coralville, IA) encoding two opposing BseRI restriction sites flanked by an N-terminal methionine and C-terminal Phe-Cys (See Supplemental Figure 1). BseRI is a type II endonuclease, which unlike other commonly used restriction enzymes, cuts at a defined number of nucleotides from its recognition sequence. Hence two opposing restriction sites results in the self-excision of the interposing segment, leaving a linearized vector with 2-bp degenerate overhangs. 1.5 µg of the modified vector was thus linearized with 2U of BseRI at 37 °C overnight, treated with calf intestinal phosphatase for 1 h, and then ligated with the ELP gene containing compatible sticky ends. The product was transformed into chemically competent TOP10™ cells (Invitrogen; Carlsbad, CA) and plated on TBdry agar plates (MO BIO Laboratories, Inc; Carlsbad, CA) supplemented with 45 µg/mL of kanamycin. The sequences were verified using DNA



**SDS-PAGE analysis.** SDS-PAGE was performed in a Mini-Protean cell (Bio-Rad) using 4-20 % Tris-HCl precast gels. The gels were visualized with copper staining (0.5 M  $\text{CuCl}_2$ ).

**Light scattering characterization.** Dynamic light scattering measurements were performed with an ALV-SP86 goniometer, an Uniphase HeNe laser (25 mW output power at 632.8 nm wavelength), an ALV/High QE APD avalanche diode fiberoptic detection system and an ALV-3000 correlator. The measurements were performed at 20 °C at the scattering angle of 30°. All ELP solutions were prepared in 20 mM NaCl at a concentration of 5 g/L. All solutions were filtered through anotop 0.02  $\mu\text{m}$  filter (Whatman) followed by GHP 0.2  $\mu\text{m}$  filter (Pall) into dust-free Suprasil cuvettes (20 mm diameter, Hellma, Mülheim).

Separate plots of the fits to the hydrodynamic radii as shown in Fig 2 of the main text

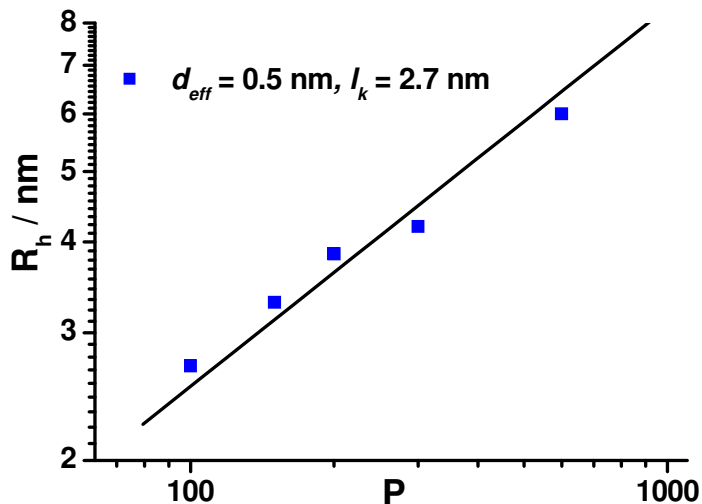

**Figure S2:** Double logarithmic plot of the hydrodynamic radius  $R_h$  vs. the number of peptide repeat units  $P$ . The red line represents the fit for  $d_{eff} = 0.5 \text{ nm}$ ,  $l_k = 2.7 \text{ nm}$  to the data assuming a repeat unit length  $b = 0.365 \text{ nm}$ .

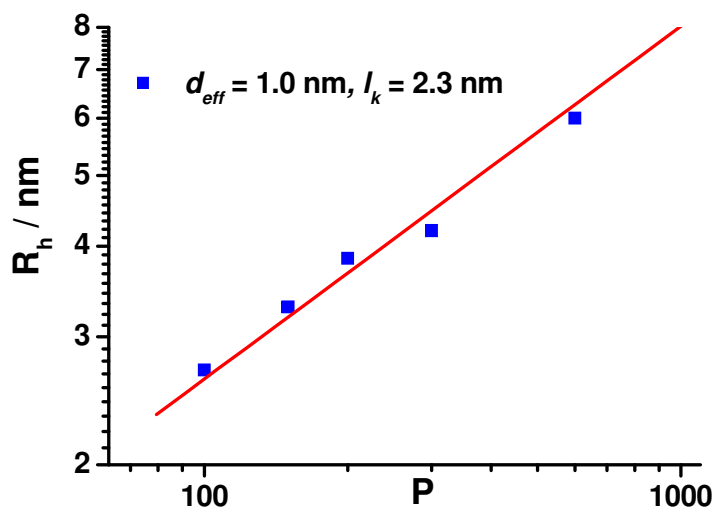

**Figure S3:** Double logarithmic plot of the hydrodynamic radius  $R_h$  vs. the number of peptide repeat units  $P$ . The red line represents the fit for  $d_{eff} = 1.0$  nm,  $l_k = 2.3$  nm to the data assuming a repeat unit length  $b = 0.365$  nm.

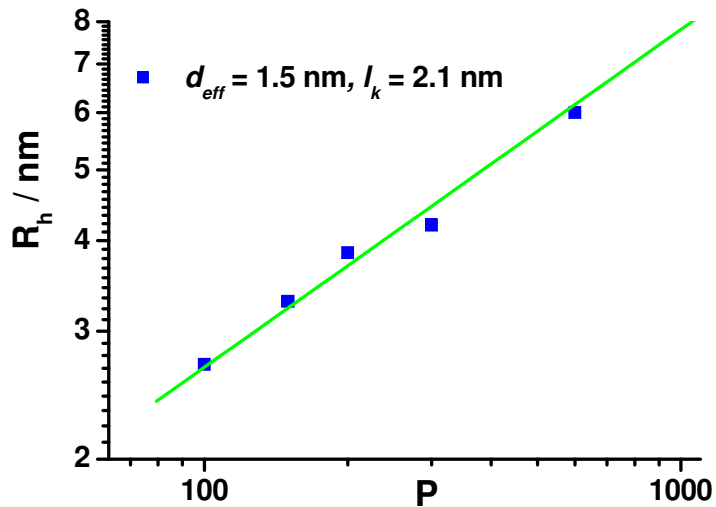

**Figure S4:** Double logarithmic plot of the hydrodynamic radius  $R_h$  vs. the number of peptide repeat units  $P$ . The green line represents the fit for  $d_{eff} = 1.5$  nm,  $l_k = 2.1$  nm to the data assuming a repeat unit length  $b = 0.365$  nm.

### Linear presentation of the data of Fig. 2 in the main text

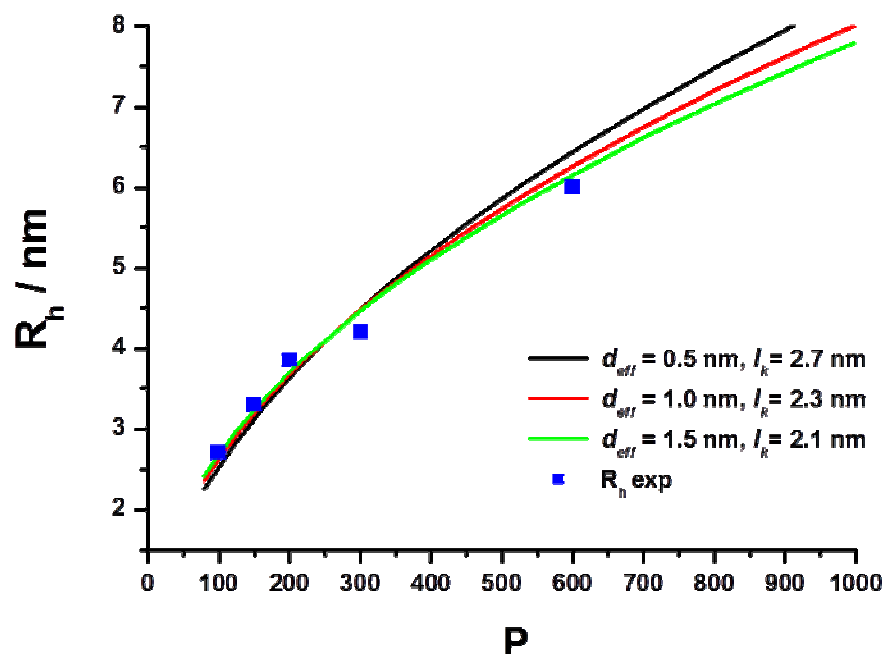

**Fig. S5:** Linear presentation of the hydrodynamic radius  $R_h$  vs. the number of peptide repeat units  $P$ . The lines represent the best fits to the data assuming a repeat unit length  $b = 0.365 \text{ nm}$ . Black line:  $d_{eff} = 0.5 \text{ nm}$ ,  $l_k = 2.7 \text{ nm}$ , red line:  $d_{eff} = 1.0 \text{ nm}$ ,  $l_k = 2.3 \text{ nm}$ , green line:  $d_{eff} = 1.5 \text{ nm}$ ,  $l_k = 2.1 \text{ nm}$ .

- (1) McDaniel, J. R.; MacKay, J. A.; Quiroz, F. G.; Chilkoti, A. *Biomacromolecules* **2010**, *11*, 944-952.
- (2) Guda, C.; Zhang, X.; McPherson, D. T.; Xu, J.; Cherry, J. H.; Urry, D. W.; Daniell, H. *Biotechnol. Lett.* **1995**, *17*, 745-750.
- (3) Meyer, D. E.; Chilkoti, A. *Nat. Biotechnol.* **1999**, *17*, 1112-1115.
